# Supplementary material for: Cubane-like tetranuclear Cu(ii) complexes bearing a Cu4O4 core: crystal structure, magnetic properties, DFT calculations and phenoxazinone synthase like activity
Source: Royal Society of Chemistry journal article supplement (doi:10.1039/c6dt03754b), 2016-12-19
Supplement: c6dt03754b1.pdf [file c6dt03754b1.pdf]

## Cubane-like tetranuclear Cu(II) complexes bearing a Cu<sub>4</sub>O<sub>4</sub> core: crystal structure, magnetic properties, DFT calculations and phenoxazinone synthase like activity

Shipra Sagar,<sup>a†</sup> Swaraj Sengupta,<sup>a,b,‡</sup> Shyamal K. Chattopadhyay,<sup>b</sup> Antonio J. Mota,<sup>\*c</sup> Arturo Espinosa Ferao,<sup>\*d</sup> Eric Riviere,<sup>\*e</sup> William Lewis,<sup>f</sup> Subhendu Naskar<sup>\*a</sup>

### INDEX

|                                                                                                                           | <u>Page</u> |
|---------------------------------------------------------------------------------------------------------------------------|-------------|
| <b>Figure S1:</b> <sup>1</sup> H- NMR spectra of pro-ligand <b>1a</b> . .....                                             | S2          |
| <b>Figure S2:</b> Mass spectrum of pro-ligand <b>1a</b> . .....                                                           | S2          |
| <b>Figure S3:</b> <sup>1</sup> H- NMR spectra of pro-ligand <b>1b</b> . .....                                             | S3          |
| <b>Figure S4:</b> Mass spectrum of pro-ligand <b>1b</b> . .....                                                           | S3          |
| <b>Figure S5:</b> FTIR spectrum of complex <b>3a</b> . .....                                                              | S4          |
| <b>Figure S6:</b> FTIR spectrum of complex <b>3b</b> . .....                                                              | S4          |
| <b>Table S1:</b> Crystal refinement parameters for complexes <b>3a</b> , <b>3b</b> and pro-ligand <b>1a</b> . .....       | S5          |
| <b>Table S2:</b> Selected bond lengths and angles for complexes <b>3a</b> and <b>3b</b> . .....                           | S5          |
| <b>Figure S7:</b> Evolution of the vis-UV spectrum of complex <b>3a</b> after addition of OAPH. .                         | S7          |
| <b>Figure S8:</b> Lineweaver-Burk plot for the oxidation of 2-aminophenol catalyzed<br>by complex <b>3a</b> . .....       | S7          |
| <b>Figure S9:</b> Evolution of the vis-UV spectrum of complex <b>3b</b> after addition of OAPH. .                         | S8          |
| <b>Figure S10:</b> Lineweaver-Burk plot for the oxidation of 2-aminophenol catalyzed<br>by complex <b>3b</b> . .....      | S8          |
| <b>Figure S11:</b> Temperature dependence of $\chi$ and $\chi T$ for complex <b>3a</b> . .....                            | S9          |
| Equations obtained for the determination of magnetic coupling constants in <b>3a-model</b><br>and <b>3b-model</b> . ..... | S10         |
| <b>Table S3:</b> Cartesian coordinates of the calculated model compounds. .....                                           | S11         |

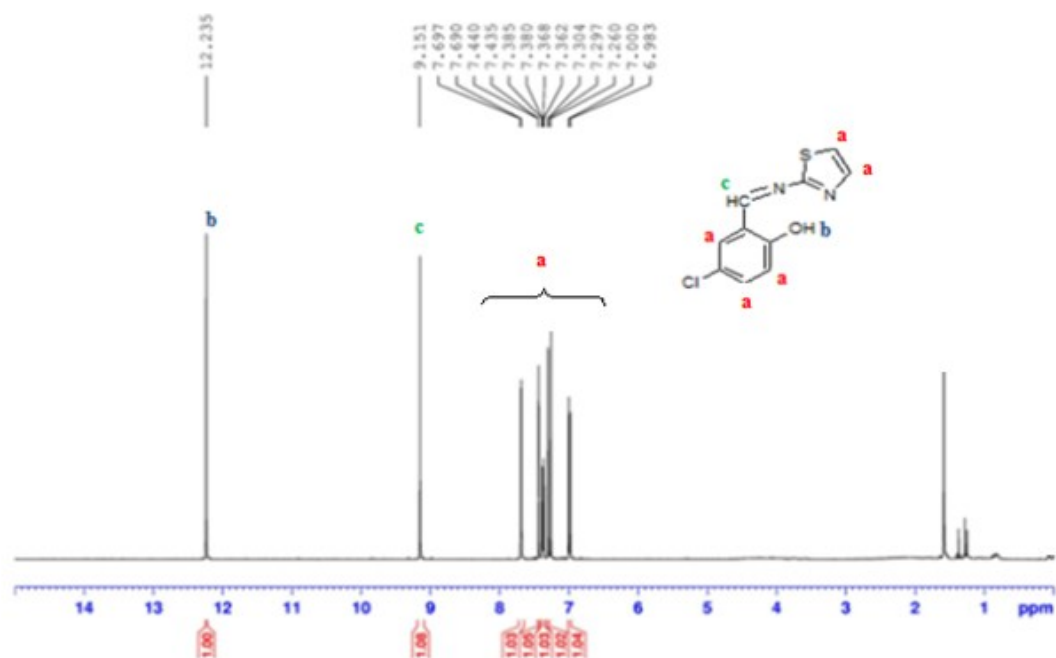

Figure S1.  $^1\text{H-NMR}$  spectrum of pro-ligand **1a**.

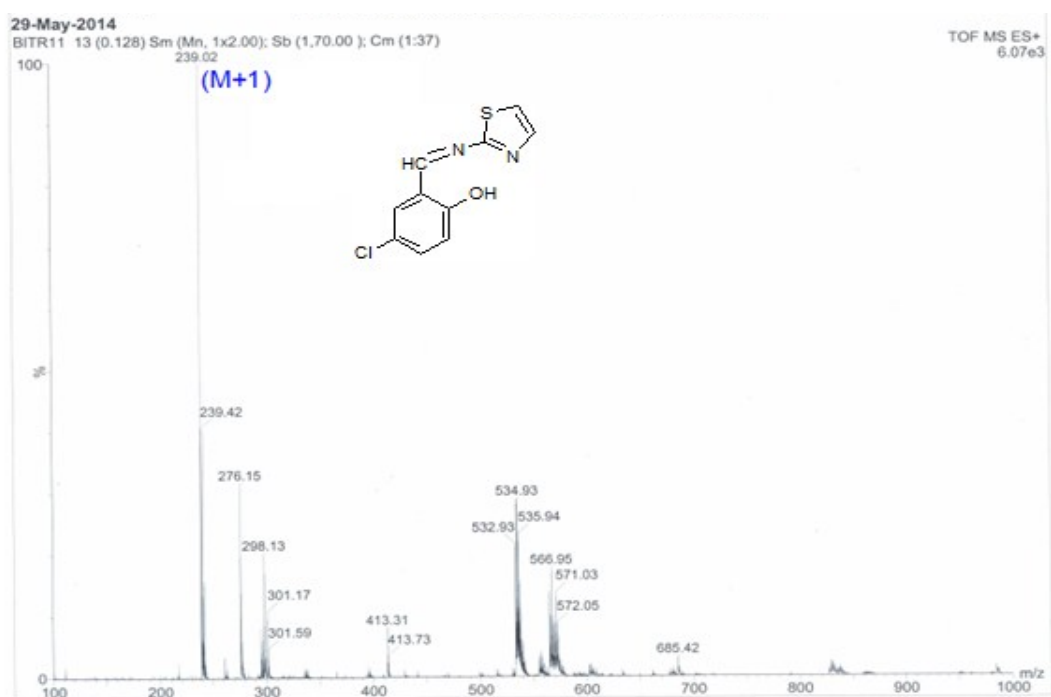

Figure S2. Mass spectrum of pro-ligand **1a**.

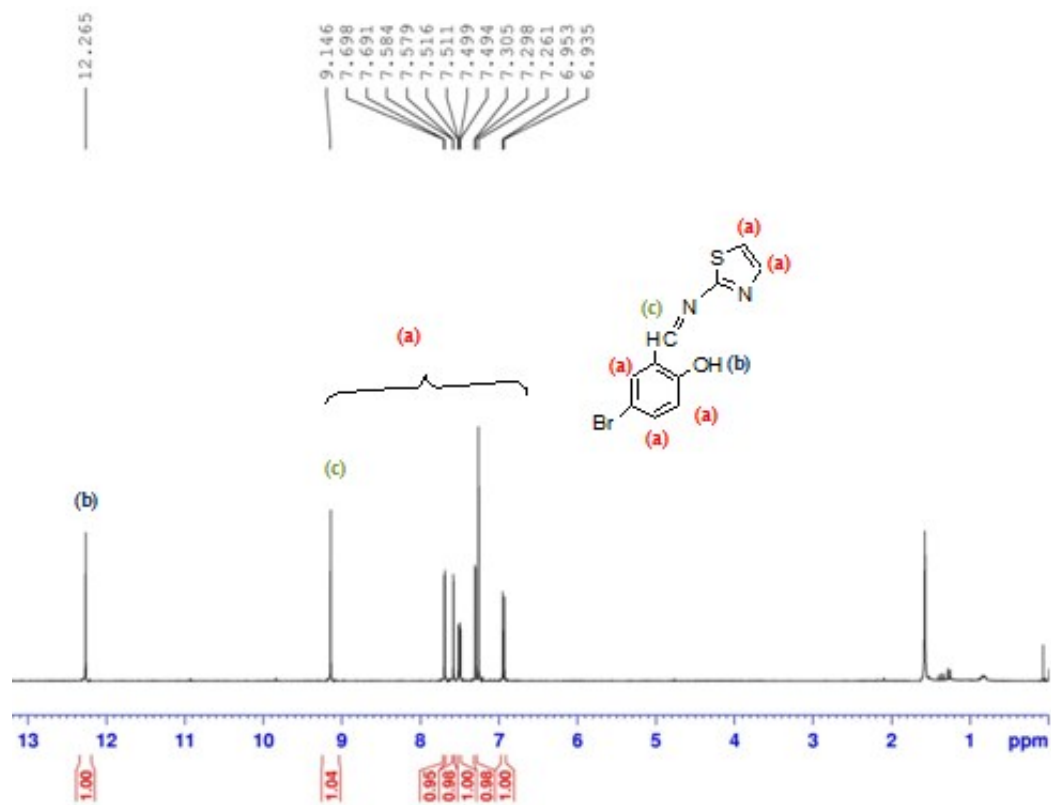

Figure S3.  $^1\text{H-NMR}$  spectrum of pro-ligand **1b**.

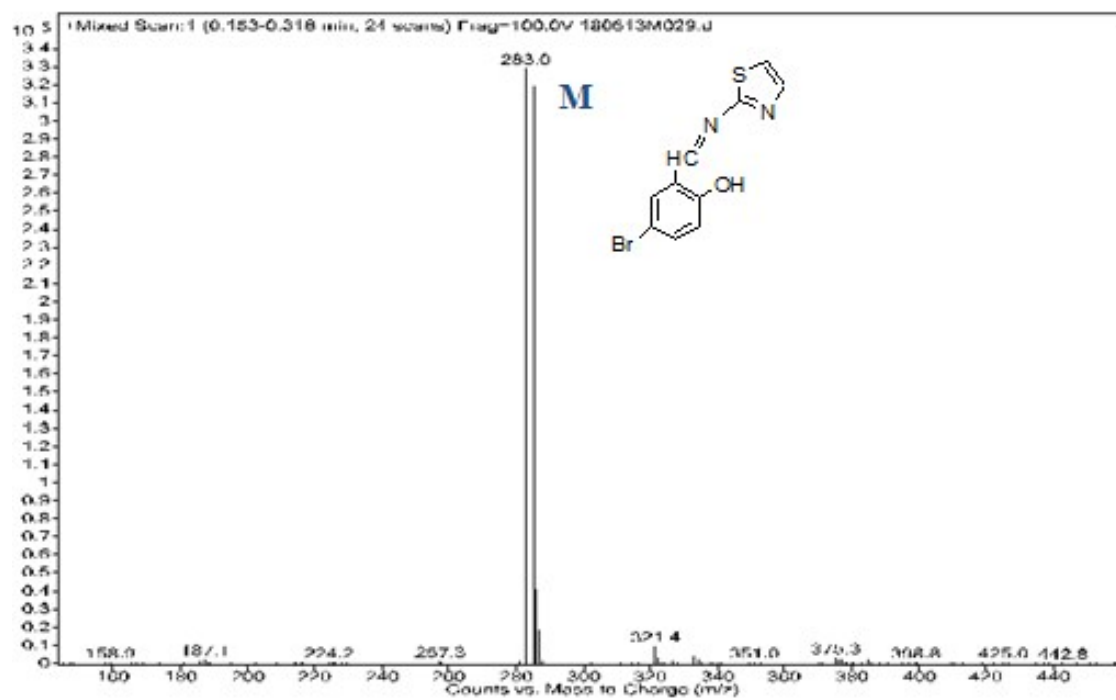

Figure S4. Mass spectrum of pro-ligand **1b**.

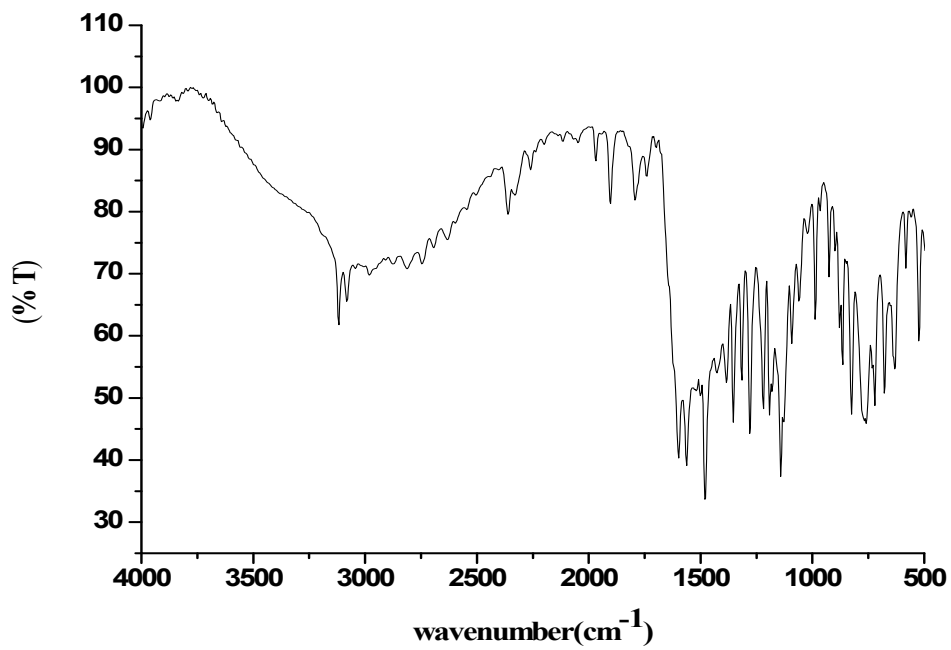

Figure S5: FTIR spectrum of complex 3a.

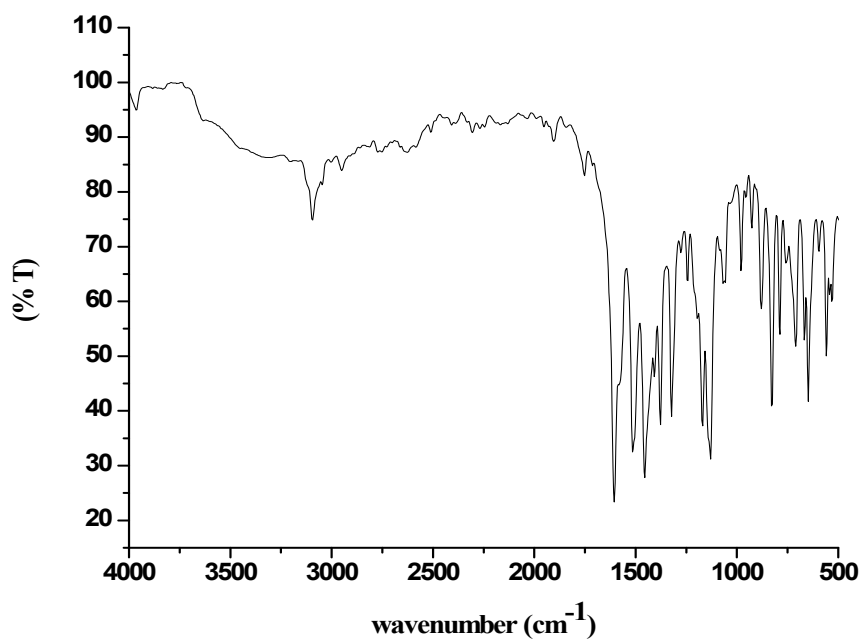

Figure S6: FTIR spectrum of complex 3b.

**Table S1.** Crystal refinement parameters for complexes **3a**, **3b** and pro-ligand **1a**

|                                             | <b>3a·2DMSO·2H<sub>2</sub>O</b>                                                                               | <b>3b·2DMSO·2H<sub>2</sub>O</b>                                                                               | <b>1a</b>                                                        |
|---------------------------------------------|---------------------------------------------------------------------------------------------------------------|---------------------------------------------------------------------------------------------------------------|------------------------------------------------------------------|
| Empirical formula                           | C <sub>44</sub> H <sub>44</sub> Cl <sub>4</sub> Cu <sub>4</sub> N <sub>8</sub> O <sub>12</sub> S <sub>6</sub> | C <sub>44</sub> H <sub>44</sub> Br <sub>4</sub> Cu <sub>4</sub> N <sub>8</sub> O <sub>12</sub> S <sub>6</sub> | C <sub>10</sub> H <sub>7</sub> N <sub>2</sub> OSCl               |
| Formula weight                              | 1465.19                                                                                                       | 1643.03                                                                                                       | 238.69                                                           |
| Temperature/K                               | 120(2)                                                                                                        | 120(2)                                                                                                        | 120(2)                                                           |
| Crystal system                              | triclinic                                                                                                     | triclinic                                                                                                     | monoclinic                                                       |
| Space group                                 | P-1                                                                                                           | P-1                                                                                                           | P2 <sub>1</sub> /c                                               |
| a/Å                                         | 14.5168(9)                                                                                                    | 14.5404(14)                                                                                                   | 14.7035(4)                                                       |
| b/Å                                         | 14.9751(10)                                                                                                   | 15.0453(15)                                                                                                   | 3.79321(9)                                                       |
| c/Å                                         | 15.6509(10)                                                                                                   | 15.6677(16)                                                                                                   | 17.8136(5)                                                       |
| $\alpha$ /°                                 | 81.622(5)                                                                                                     | 81.325(9)                                                                                                     | 90                                                               |
| $\beta$ /°                                  | 71.061(6)                                                                                                     | 70.620(9)                                                                                                     | 92.866(3)                                                        |
| $\gamma$ /°                                 | 71.633(6)                                                                                                     | 71.468(9)                                                                                                     | 90                                                               |
| Volume/Å <sup>3</sup>                       | 3050.6(4)                                                                                                     | 3061.7(6)                                                                                                     | 992.28(5)                                                        |
| Z                                           | 2                                                                                                             | 2                                                                                                             | 4                                                                |
| $\rho_{\text{calc}}$ /g/cm <sup>3</sup>     | 1.595                                                                                                         | 1.782                                                                                                         | 1.598                                                            |
| $\mu$ /mm <sup>-1</sup>                     | 5.617                                                                                                         | 7.049                                                                                                         | 5.145                                                            |
| F(000)                                      | 1480.0                                                                                                        | 1624.0                                                                                                        | 488.0                                                            |
| Crystal size/mm <sup>3</sup>                | 0.2084 × 0.1962 × 0.0433                                                                                      | 0.209 × 0.0662 × 0.0264                                                                                       | 0.3147 x 0.0747 x 0.0481                                         |
| Radiation                                   | CuK $\alpha$ ( $\lambda$ = 1.54184)                                                                           | CuK $\alpha$ ( $\lambda$ = 1.54184)                                                                           | CuK $\alpha$ ( $\lambda$ = 1.54184)                              |
| 2 $\theta$ range for data collection/°      | 5.978 to 148.544                                                                                              | 6.728 to 133.202                                                                                              | 9.944 to 148.096                                                 |
| Index ranges                                | -18 ≤ h ≤ 17, -13 ≤ k ≤ 18,<br>-19 ≤ l ≤ 19                                                                   | -17 ≤ h ≤ 12, -17 ≤ k ≤ 17,<br>-18 ≤ l ≤ 18                                                                   | -17 ≤ h ≤ 17, -4 ≤ k ≤ 2,<br>-21 ≤ l ≤ 19                        |
| Reflections collected                       | 21882                                                                                                         | 32366                                                                                                         | 4575                                                             |
| Independent reflections                     | 11993<br>[R <sub>int</sub> = 0.0464, R <sub>sigma</sub> = 0.0513]                                             | 10828<br>[R <sub>int</sub> = 0.1181, R <sub>sigma</sub> = 0.1041]                                             | 1965<br>[R <sub>int</sub> = 0.0260, R <sub>sigma</sub> = 0.0269] |
| Data/restraints/parameters                  | 11993/786/726                                                                                                 | 10828/1351/723                                                                                                | 1965/0/139                                                       |
| Goodness-of-fit on F <sup>2</sup>           | 1.029                                                                                                         | 1.221                                                                                                         | 1.050                                                            |
| Final R indexes [ $I \geq 2\sigma(I)$ ]     | R <sub>1</sub> = 0.0704, wR <sub>2</sub> = 0.1821                                                             | R <sub>1</sub> = 0.1273, wR <sub>2</sub> = 0.3317                                                             | R <sub>1</sub> = 0.0381, wR <sub>2</sub> = 0.1092                |
| Final R indexes [all data]                  | R <sub>1</sub> = 0.0845, wR <sub>2</sub> = 0.1941                                                             | R <sub>1</sub> = 0.1781, wR <sub>2</sub> = 0.3879                                                             | R <sub>1</sub> = 0.0419, wR <sub>2</sub> = 0.1145                |
| Largest diff. peak/hole / e Å <sup>-3</sup> | 1.80/-1.15                                                                                                    | 2.63/-1.09                                                                                                    | 0.58/-0.40                                                       |

**Table S2:** Selected bond lengths (Å) and angles (°) for complexes **3a** and **3b**

|                       | <b>3a·2DMSO·2H<sub>2</sub>O</b> | <b>3b·2DMSO·2H<sub>2</sub>O</b> |
|-----------------------|---------------------------------|---------------------------------|
| <i>Bond distances</i> |                                 |                                 |
| Cu1-O8                | 1.947(4)                        | 1.965(9)                        |
| Cu1-O15               | 1.910(4)                        | 1.909(9)                        |
| Cu1-O48               | 1.979(3)                        | 1.963(8)                        |
| Cu1-O68               | 2.403(3)                        | 2.400(9)                        |
| Cu1-N41               | 1.983(5)                        | 2.000(12)                       |
| Cu2-O8                | 1.985(3)                        | 1.973(8)                        |
| Cu2-O28               | 1.947(4)                        | 1.966(9)                        |
| Cu2-O35               | 1.897(3)                        | 1.900(9)                        |
| Cu2-O48               | 2.401(4)                        | 2.409(9)                        |
| Cu2-N1                | 1.968(5)                        | 1.990(12)                       |
| Cu3-O8                | 2.375(4)                        | 2.378(9)                        |
| Cu3-O28               | 1.989(3)                        | 1.985(8)                        |
| Cu3-O68               | 1.944(4)                        | 1.969(9)                        |
| Cu3-O75               | 1.920(3)                        | 1.925(9)                        |
| Cu3-N21               | 1.965(4)                        | 2.015(11)                       |
| Cu4-O28               | 2.381(4)                        | 2.401(9)                        |
| Cu4-O48               | 1.953(4)                        | 1.955(9)                        |
| Cu4-O55               | 1.909(4)                        | 1.912(10)                       |

|         |          |           |
|---------|----------|-----------|
| Cu4-O68 | 1.982(3) | 1.962(8)  |
| Cu4-N61 | 1.971(5) | 1.995(13) |
| C10-O15 | 1.323(7) | 1.309(18) |
| C30-O35 | 1.326(7) | 1.292(16) |
| C50-O55 | 1.320(8) | 1.290(19) |
| C70-O75 | 1.335(7) | 1.326(17) |

*Bond angles*

|             |            |          |
|-------------|------------|----------|
| O8-Cu1-O48  | 84.03(14)  | 84.00(4) |
| O8-Cu1-O68  | 81.55(13)  | 81.7(3)  |
| O8-Cu1-N41  | 172.61(16) | 172.2(4) |
| O15-Cu1-O8  | 94.68(16)  | 94.1(4)  |
| O15-Cu1-O48 | 172.41(17) | 172.8(4) |
| O15-Cu1-O68 | 114.23(15) | 114.3(4) |
| O15-Cu1-N41 | 92.48(18)  | 93.6(4)  |
| O48-Cu1-O68 | 73.03(13)  | 72.4(3)  |
| O48-Cu1-N41 | 89.10(16)  | 88.4(4)  |
| N41-Cu1-O68 | 93.86(16)  | 94.3(4)  |
| O8-Cu2-O48  | 72.93(13)  | 72.9(3)  |
| O28-Cu2-O8  | 84.29(14)  | 84.9(3)  |
| O28-Cu2-O48 | 81.66(13)  | 82.1(3)  |
| O28-Cu2-N1  | 174.05(15) | 174.9(4) |
| O35-Cu2-O8  | 172.90(17) | 171.7(4) |
| O35-Cu2-O28 | 94.70(15)  | 94.1(4)  |
| O35-Cu2-O48 | 113.93(15) | 115.2(4) |
| O35-Cu2-N1  | 91.24(17)  | 91.0(4)  |
| N1-Cu2-O8   | 89.85(15)  | 90.1(4)  |
| N1-Cu2-O48  | 95.68(16)  | 95.2(4)  |
| O28-Cu3-O8  | 73.80(13)  | 74.5(3)  |
| O68-Cu3-O8  | 82.34(13)  | 82.2(3)  |
| O68-Cu3-O28 | 84.72(14)  | 84.9(3)  |
| O68-Cu3-N21 | 174.30(15) | 174.1(4) |
| O75-Cu3-O8  | 112.85(15) | 112.6(4) |
| O75-Cu3-O28 | 172.73(17) | 172.3(4) |
| O75-Cu3-O68 | 93.14(15)  | 93.2(4)  |
| O75-Cu3-N21 | 92.40(16)  | 92.6(4)  |
| N21-Cu3-O8  | 96.72(16)  | 96.6(4)  |
| N21-Cu3-O28 | 89.62(15)  | 89.2(4)  |
| O48-Cu4-O28 | 82.05(14)  | 82.6(3)  |
| O48-Cu4-O68 | 83.86(14)  | 83.2(4)  |
| O48-Cu4-N61 | 172.54(18) | 171.7(5) |
| O55-Cu4-O28 | 111.36(17) | 112.6(4) |
| O55-Cu4-O48 | 94.10(18)  | 94.9(4)  |
| O55-Cu4-O68 | 173.84(18) | 172.3(4) |
| O55-Cu4-N61 | 93.3(2)    | 93.3(5)  |
| O68-Cu4-O28 | 74.18(13)  | 74.6(3)  |
| N61-Cu4-O28 | 94.68(18)  | 93.0(5)  |
| N61-Cu4-O68 | 88.81(18)  | 88.9(5)  |

---

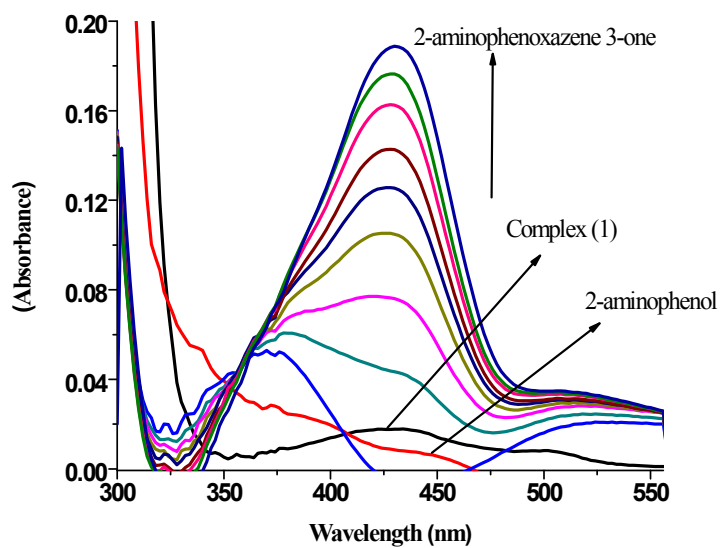

**Figure S7:** Evolution of the visible-UV spectrum of complex **3a** in MeOH after addition of OAPH up to 1 hour.

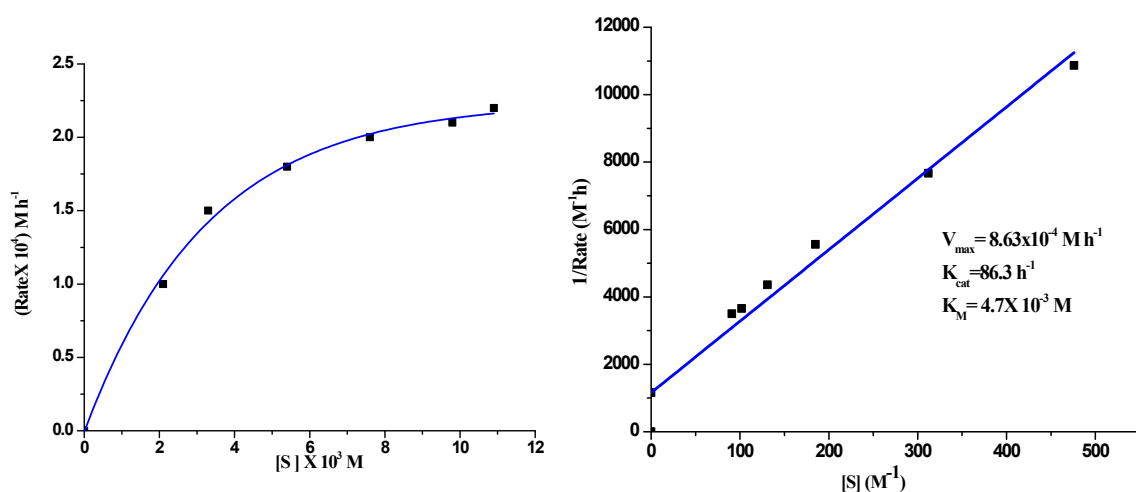

**Figure S8:** a) Rate vs substrate concentration plot for the oxidation of 2-aminophenol in MeOH catalyzed by **3a** at 25 °C. b) Lineweaver-Burk plot for the oxidation of 2-aminophenol catalyzed by complex **3a**.

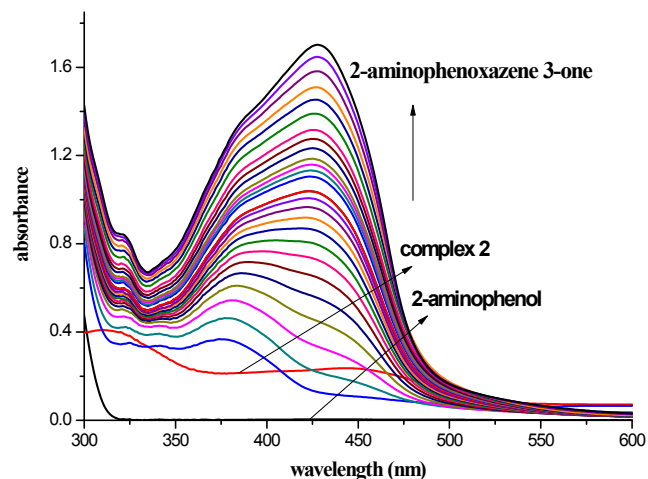

**Figure S9:** Evolution of the visible-UV spectrum of complex **3b** in MeOH after addition of OAPH up to 4.5 hour.

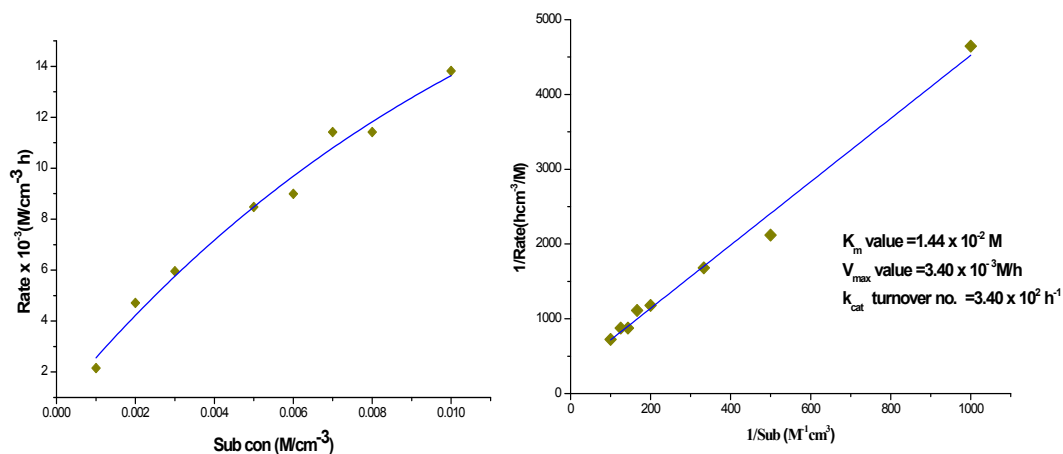



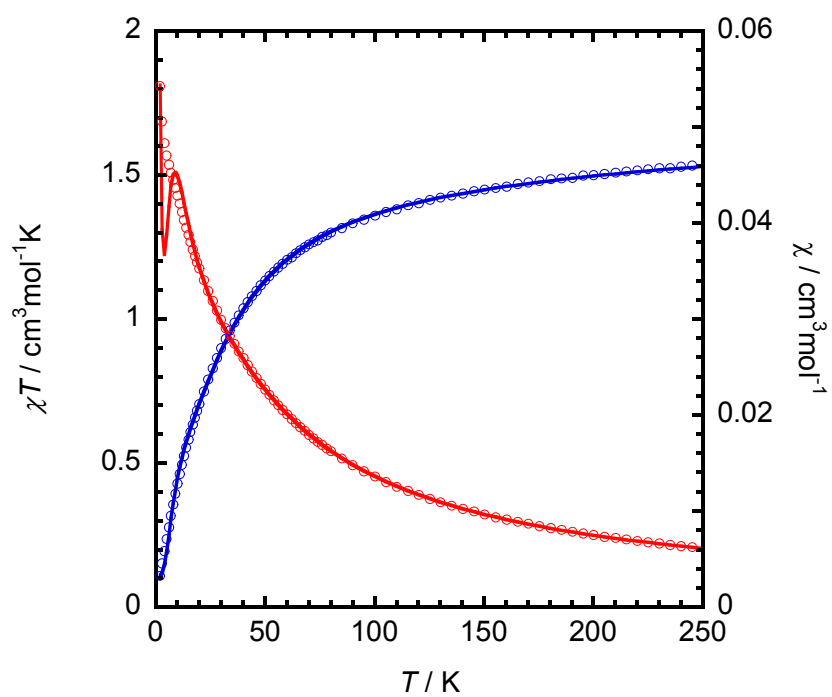

**Figure S11:** Temperature dependence of  $\chi$  (○ experimental data, — best fit) and  $\chi T$  (○ experimental data, — best fit) for complex **3a**:  $J_1 = -36.4 \text{ cm}^{-1}$ ,  $J'_1 = -8.0 \text{ cm}^{-1}$ ,  $J_2 = +6.7 \text{ cm}^{-1}$ ,  $g = 2.23$ ,  $\text{TIP} = 60 \times 10^{-6}$  per Cu,  $\rho = 0.23$  with  $R_{\chi T} = 9.0 \times 10^{-5}$  and  $R_{\chi} = 6.7 \times 10^{-3}$ .

Equations obtained for the determination of magnetic coupling constants in **3a-model** and **3b-model**

Sub-indices in E (calculated energy in  $\text{cm}^{-1}$ ) make reference to the spin multiplicity of the considered calculated state:

**For 3a-model**

$$E_{3a-5} = J_1 + J_4 + J_6 = -25.240$$

$$E_{3b-5} = J_1 + J_2 + J_5 = -22.189$$

$$E_{3c-5} = J_2 + J_3 + J_4 = -16.658$$

$$E_{3d-5} = J_3 + J_5 + J_6 = -20.433$$

$$E_{1a-5} = J_2 + J_4 + J_5 + J_6 = -14.485$$

$$E_{1b-5} = J_1 + J_2 + J_3 + J_6 = -52.213$$

$$E_{1c-5} = J_1 + J_3 + J_4 + J_5 = -12.269$$

**For 3b-model**

$$E_{3a-5} = J_1 + J_4 + J_6 = -15.144$$

$$E_{3b-5} = J_1 + J_2 + J_5 = -19.182$$

$$E_{3c-5} = J_2 + J_3 + J_4 = -4.016$$

$$E_{3d-5} = J_3 + J_5 + J_6 = +0.132$$

$$E_{1a-5} = J_2 + J_4 + J_5 + J_6 = +3.182$$

$$E_{1b-5} = J_1 + J_2 + J_3 + J_6 = -28.159$$

$$E_{1c-5} = J_1 + J_3 + J_4 + J_5 = -8.252$$

**Table S3.** Cartesian coordinates (Å) of the calculated model compounds**3a-model**

|    |              |              |             |   |             |              |              |
|----|--------------|--------------|-------------|---|-------------|--------------|--------------|
| Cu | 6.224800742  | 9.310421295  | 2.785599963 | H | 8.197807969 | 7.326076511  | 2.476848355  |
| Cu | 8.429132742  | 11.506502295 | 2.058114963 | H | 9.504580586 | 8.308650275  | 1.804117203  |
| Cu | 6.340091742  | 12.139757295 | 4.369212963 | C | 3.004286382 | 9.188157740  | 1.872403258  |
| Cu | 8.547669742  | 9.929260295  | 4.898857963 | H | 2.899415403 | 9.164692569  | 0.781733777  |
| O  | 6.481952742  | 11.154019295 | 2.213222963 | H | 2.510213090 | 8.294688670  | 2.270790187  |
| O  | 4.388744742  | 9.240717295  | 2.264974963 | H | 2.452341920 | 10.061400662 | 2.238344213  |
| O  | 8.274500742  | 12.079102295 | 3.912167963 | C | 5.680475431 | 11.513536527 | 1.072178931  |
| O  | 10.231282742 | 12.066954295 | 1.871659963 | H | 6.292348001 | 11.604532817 | 0.167502145  |
| O  | 8.182466742  | 9.343708295  | 3.070827963 | H | 4.908247187 | 10.761518177 | 0.874089346  |
| O  | 10.372649742 | 9.372033295  | 4.858490963 | H | 5.174569840 | 12.473423233 | 1.226405113  |
| O  | 6.601479742  | 10.301260295 | 4.941293963 | C | 3.196162185 | 12.253859465 | 5.548922654  |
| O  | 4.543594742  | 12.204957295 | 5.043319963 | H | 2.463924124 | 12.258508259 | 4.733499902  |
| N  | 8.393714742  | 10.856144295 | 0.200807963 | H | 2.976831395 | 11.388426413 | 6.184553978  |
| N  | 6.269334742  | 14.007646295 | 3.764304963 | H | 3.027621610 | 13.155296691 | 6.149017375  |
| N  | 6.183770742  | 7.458332295  | 3.493715963 | C | 5.909976830 | 9.954847914  | 6.155963541  |
| N  | 8.677210742  | 10.614475295 | 6.742264963 | H | 4.832399696 | 9.850212575  | 5.985706621  |
| C  | 9.055292669  | 13.248893066 | 4.221285282 | H | 6.273252884 | 9.005194806  | 6.564983133  |
| H  | 8.902654840  | 13.567844601 | 5.258628072 | H | 6.049437184 | 10.721167606 | 6.926945779  |
| H  | 10.126640541 | 13.060151662 | 4.088251594 | H | 5.337740291 | 14.370523783 | 3.785558379  |
| H  | 8.785647692  | 14.091120839 | 3.573942531 | H | 6.829368179 | 14.605783529 | 4.337536503  |
| C  | 11.599661614 | 12.492507482 | 1.730084021 | H | 6.600731761 | 14.107667207 | 2.826130228  |
| H  | 12.086496506 | 12.601917913 | 2.705855306 | H | 7.691781564 | 10.157011672 | 0.064780793  |
| H  | 12.184050223 | 11.770218016 | 1.148796292 | H | 8.202167262 | 11.592833802 | -0.447727413 |
| H  | 11.665959772 | 13.459146289 | 1.217909596 | H | 9.267089728 | 10.449869581 | -0.067812568 |
| C  | 11.749573478 | 8.951612752  | 4.828034585 | H | 6.948188384 | 7.279904025  | 4.113255324  |
| H  | 12.151086695 | 8.826596457  | 5.840095115 | H | 6.235853301 | 6.778944906  | 2.761786879  |
| H  | 11.862946711 | 7.993942998  | 4.307340149 | H | 5.344147028 | 7.273901946  | 4.004614647  |
| H  | 12.379312548 | 9.684807663  | 4.311350351 | H | 9.599408933 | 10.937279876 | 6.955214954  |
| C  | 8.890161510  | 8.146602578  | 2.697055283 | H | 8.055397790 | 11.381910817 | 6.898442335  |
| H  | 9.556397475  | 7.809937496  | 3.499485789 | H | 8.450169355 | 9.912209149  | 7.417005260  |

### 3b-model:

|    |              |              |              |   |              |              |              |
|----|--------------|--------------|--------------|---|--------------|--------------|--------------|
| Cu | 8.507593000  | 9.972998000  | -4.920554000 | H | 8.923326077  | 7.481252998  | -3.614914167 |
| Cu | 6.193325000  | 9.326345000  | -2.802214000 | H | 9.843013867  | 8.364788945  | -2.390491170 |
| Cu | 8.399428000  | 11.514177000 | -2.051916000 | C | 11.690244970 | 8.920375578  | -4.924435266 |
| Cu | 6.317969000  | 12.192642000 | -4.344435000 | H | 12.067530176 | 8.786623371  | -3.904202609 |
| O  | 6.460961000  | 11.177087000 | -2.197902000 | H | 11.792282976 | 7.960073397  | -5.442620087 |
| O  | 4.359303000  | 9.273885000  | -2.277611000 | H | 12.347434088 | 9.638543750  | -5.427869086 |
| O  | 8.254365000  | 12.137141000 | -3.911645000 | C | 3.163231370  | 12.322782770 | -5.507660669 |
| O  | 10.195994000 | 12.098193000 | -1.852496000 | H | 3.141920978  | 12.329315023 | -6.603384927 |
| O  | 8.132597000  | 9.361360000  | -3.101270000 | H | 2.577990046  | 11.459382398 | -5.171297866 |
| O  | 10.323081000 | 9.372548000  | -4.922768000 | H | 2.647480657  | 13.225949654 | -5.162118410 |
| O  | 6.578961000  | 10.335143000 | -4.944910000 | C | 11.557886317 | 12.540908104 | -1.701325063 |
| O  | 4.513302000  | 12.267089000 | -5.009858000 | H | 11.825378671 | 12.655107621 | -0.644672440 |
| N  | 8.385456000  | 10.809811000 | -0.190416000 | H | 12.261157972 | 11.826688502 | -2.144503225 |
| N  | 6.256383000  | 14.098916000 | -3.693183000 | H | 11.719251738 | 13.508954517 | -2.189132417 |
| N  | 6.171366000  | 7.458130000  | -3.517528000 | C | 2.975350806  | 9.234298707  | -1.881745807 |
| N  | 8.633296000  | 10.731189000 | -6.760504000 | H | 2.311396081  | 9.214425822  | -2.753455417 |
| C  | 5.886257493  | 9.995410604  | -6.160781601 | H | 2.757578716  | 8.344170845  | -1.280617493 |
| H  | 6.401554006  | 9.194527096  | -6.703150078 | H | 2.706609670  | 10.111392698 | -1.282085067 |
| H  | 4.865872771  | 9.651894061  | -5.956040432 | H | 9.293839780  | 10.509501718 | 0.100536304  |
| H  | 5.815507582  | 10.857394633 | -6.833898719 | H | 8.081456937  | 11.500023018 | 0.466236069  |
| C  | 9.037325006  | 13.307273912 | -4.213907466 | H | 7.773303995  | 10.024943138 | -0.094226798 |
| H  | 10.052225851 | 13.038103107 | -4.527964476 | H | 6.560432980  | 14.742128052 | -4.395914717 |
| H  | 8.585368087  | 13.891611367 | -5.023470450 | H | 5.331665134  | 14.371623332 | -3.427612710 |
| H  | 9.125249505  | 13.964829047 | -3.341554786 | H | 6.842927861  | 14.238627157 | -2.895407394 |
| C  | 5.665667284  | 11.525061149 | -1.048979941 | H | 5.267574331  | 7.201517322  | -3.860034280 |
| H  | 4.650268314  | 11.817080879 | -1.340180666 | H | 6.419564886  | 6.788732282  | -2.817310885 |
| H  | 5.580089339  | 10.682796646 | -0.353009780 | H | 9.559143319  | 11.044949867 | -6.971124182 |
| H  | 6.105523466  | 12.364574881 | -0.498660121 | H | 8.386926342  | 10.058128087 | -7.457849681 |
| C  | 8.830876620  | 8.151237619  | -2.752544612 | H | 8.024193142  | 11.514864223 | -6.882351665 |
| H  | 8.306764470  | 7.601706765  | -1.962335305 | H | 6.814689483  | 7.341931223  | -4.274253010 |
